CORRECTION

# Correction: Lack of ANKMY2 suppresses kidney cystogenesis in embryonic- and adult-onset polycystic kidney disease

The *PLOS Genetics* Staff

[S1 Data](#) was uploaded incorrectly. Please see the correct [S1 Data](#) below.  
The publisher apologizes for the error.

## Supporting information

**S1 Data. Numerical data in figures and supplemental figures.** All numerical data in figures and supplemental figures are provided in this spreadsheet.  
(XLSX)

## Reference

1. Hwang S-H, Choi K, Badgandi H, White KA, Xun Y, Woodward OM, et al. Lack of ANKMY2 suppresses kidney cystogenesis in embryonic- and adult-onset polycystic kidney disease. *PLoS Genet.* 2025;21(12):e1012008. <https://doi.org/10.1371/journal.pgen.1012008> PMID: [41474822](https://pubmed.ncbi.nlm.nih.gov/41474822/)

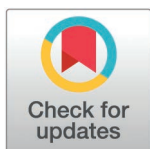

## OPEN ACCESS

**Citation:** The *PLOS Genetics* Staff (2026) Correction: Lack of ANKMY2 suppresses kidney cystogenesis in embryonic- and adult-onset polycystic kidney disease. *PLoS Genet* 22(2): e1012049. <https://doi.org/10.1371/journal.pgen.1012049>

**Published:** February 17, 2026

**Copyright:** © 2026 The *PLOS Genetics* Staff.  
This is an open access article distributed under the terms of the [Creative Commons Attribution License](#), which permits unrestricted use, distribution, and reproduction in any medium, provided the original author and source are credited.
